# Supplementary material
Source: PubMed Central journal article supplement (PMC7181317)
Supplement: oc9b01342_si_001.pdf [file oc9b01342_si_001.pdf]

Supporting Information

*of*

Near-Infrared Light Responsive Nanoreactor for Simultaneous  
Tumor Photothermal Therapy and Carbon Monoxide-Mediated  
Anti-Inflammation

*Shi-Bo Wang,<sup>†,‡,#</sup> Cheng Zhang,<sup>†,#</sup> Jing-Jie Ye,<sup>†</sup> Mei-Zhen Zou,<sup>†,‡</sup> Chuan-Jun Liu,<sup>†</sup> and Xian-Zheng Zhang<sup>\*,†,‡</sup>*

<sup>†</sup> Key Laboratory of Biomedical Polymers of Ministry of Education & Department of Chemistry,  
Wuhan University, Wuhan 430072, P. R. China

<sup>‡</sup> Institute for Advanced Studies (IAS), Wuhan University, Wuhan 430072, P. R. China

\*Corresponding author: xz-zhang@whu.edu.cn

# S.-B.W. and C.Z. contributed equally.

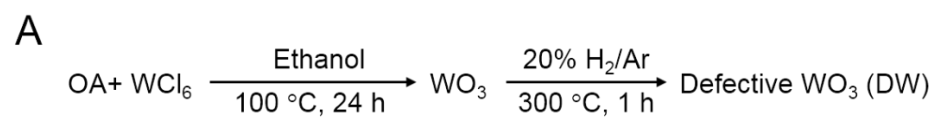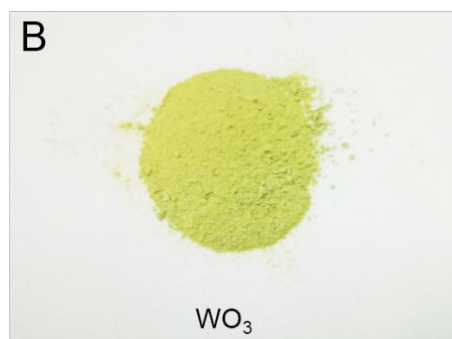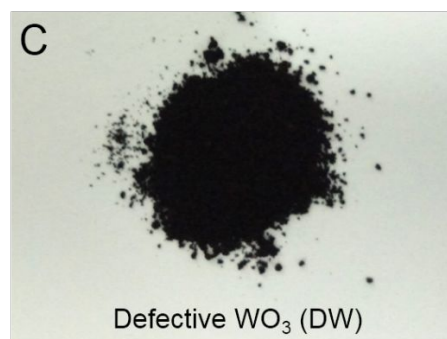

**Figure S1.** (A) Preparation of DW atomic layers. Photograph of (B) WO<sub>3</sub> atomic layers and (C) DW atomic layers.

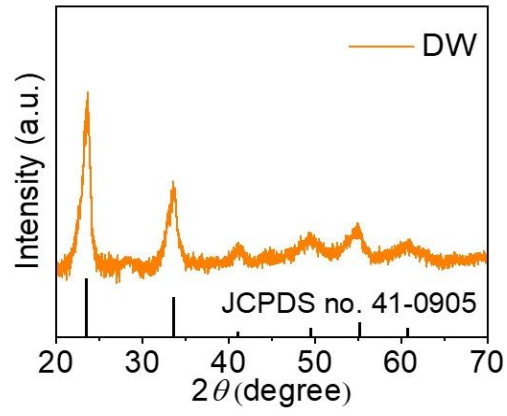

**Figure S2.** PXRD pattern of DW NSs and JCPDS card of cubic WO<sub>3</sub>.

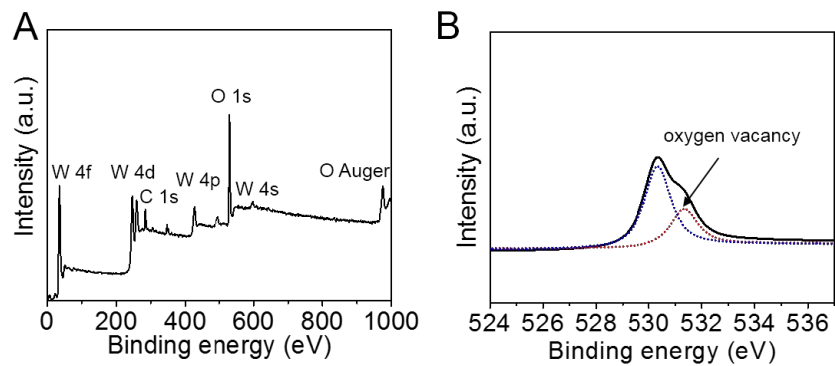

**Figure S3.** (A) XPS spectrum for DW NSs. (B) O 1s XPS spectrum for DW NSs. The atomic ratio of oxygen vacancies and oxygen atoms was calculated to be 14.7%.

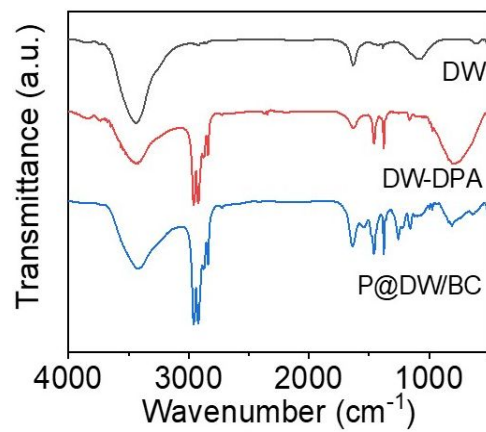

**Figure S4.** FTIR spectra for DW NSs, DW-PDA NSs, and P@DW/BC NSs.

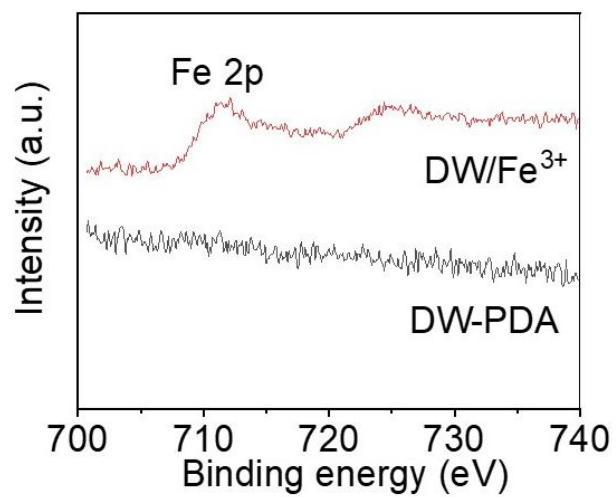

Figure S5. Fe 2p XPS spectrum for DW-PDA and DW/Fe<sup>3+</sup> NSs.

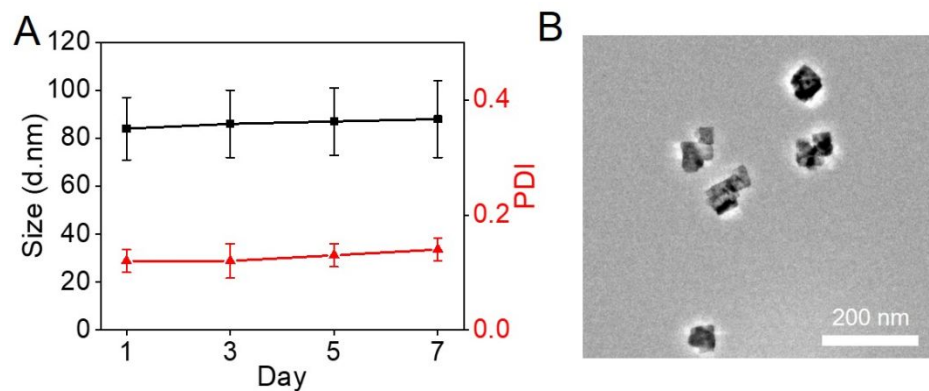

**Figure S6.** (A) Size distribution and PDI of P@DW/BC NSs in PBS (pH 7.4, 37 °C) for 7 days. (B) TEM image of P@DW/BC NSs after incubated with PBS (pH 7.4, 37 °C) for 7 days.

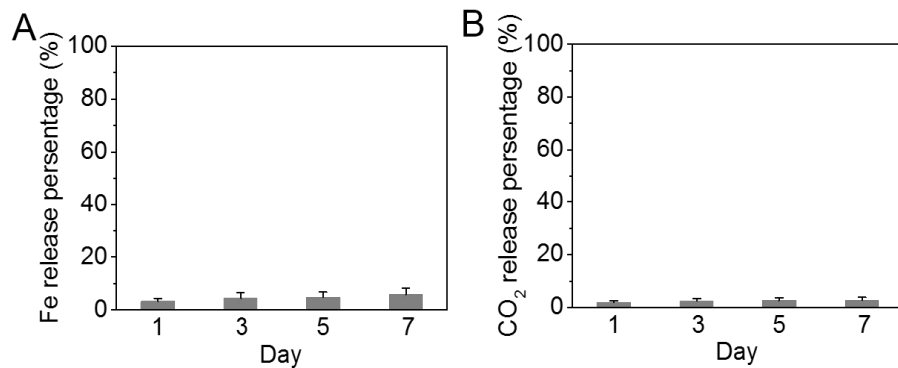

**Figure S7.** Release amount of (A) Fe<sup>3+</sup> and (B) CO<sub>2</sub> from P@DW/BC NSs in PBS (pH 7.4) at 37 °C.



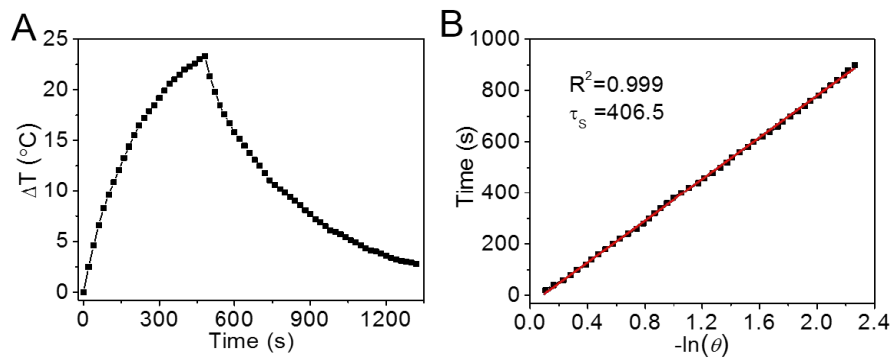

**Figure S8.** (A) Heating/Cooling experiment of P@DW/BC aqueous solution ( $200 \mu\text{g mL}^{-1}$ )

<sup>1</sup>) under 808 nm laser irradiation ( $1.5 \text{ W cm}^{-2}$ ). (B) The cooling time verses  $-\ln(\theta)$ .

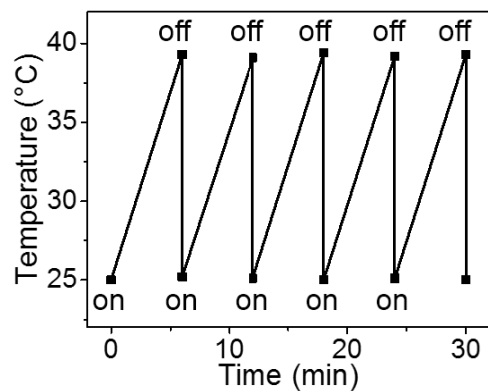

**Figure S9.** (A) Temperature changes of P@DW/BC solution ( $100 \mu\text{g mL}^{-1}$ ) over 5 cycles of irradiation/cooling (power density:  $1 \text{ W cm}^{-2}$ ).

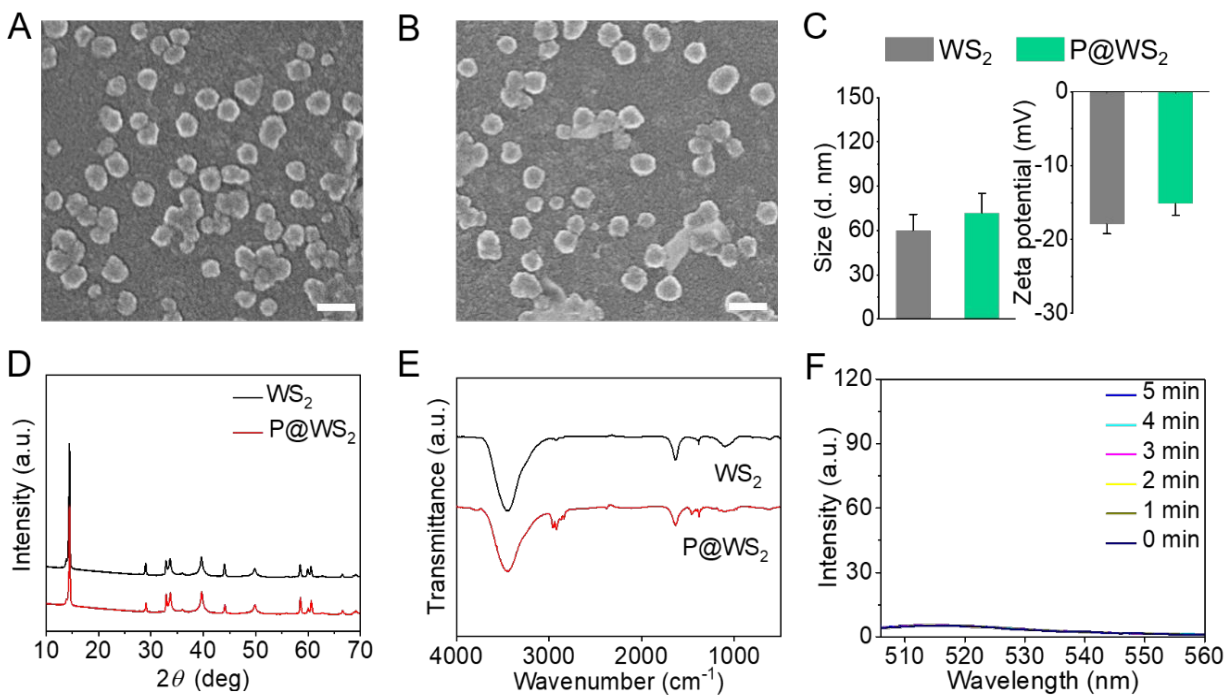

**Figure S10.** SEM images for (A) WS<sub>2</sub> NSs and (B) P@WS<sub>2</sub> NSs. Scale bar: 100 μm. (C)

Size distribution and zeta potential of WS<sub>2</sub> and P@WS<sub>2</sub> NSs. (D) XRD patterns for WS<sub>2</sub>

and P@WS<sub>2</sub> NSs. (E) FTIR spectra for WS<sub>2</sub> and P@WS<sub>2</sub> NSs. (F) CO generation

detection of P@WS<sub>2</sub> NSs (200 μg mL<sup>-1</sup>) under 808 nm laser irradiation (1 W cm<sup>-2</sup>) by

the CO probe.

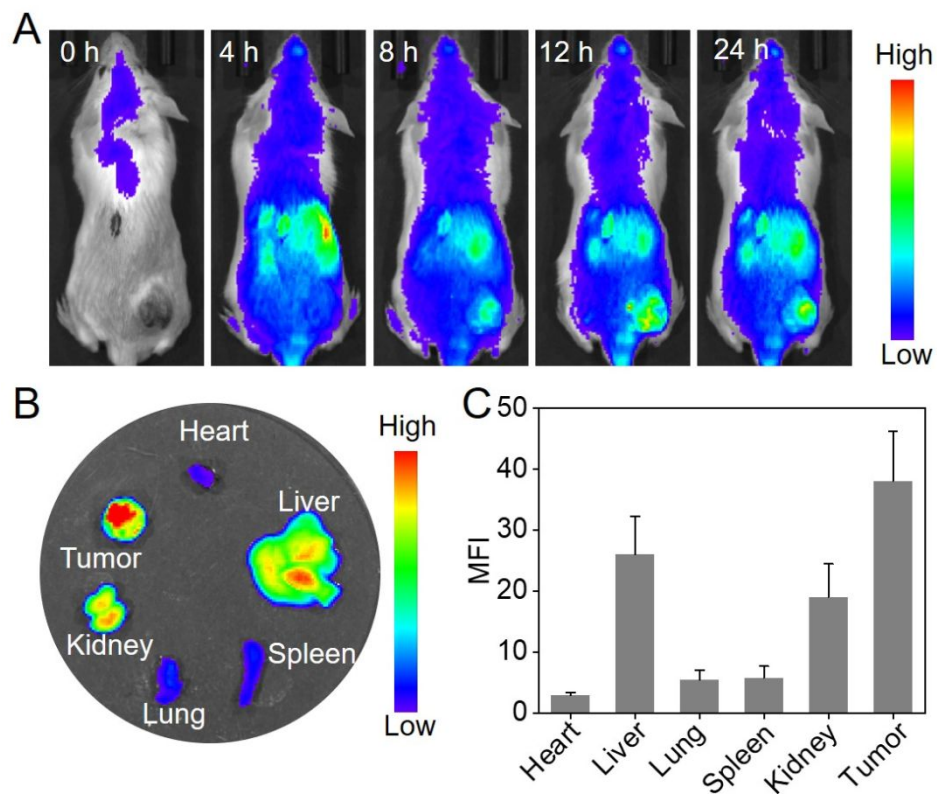

**Figure S11.** (A) *In vivo* fluorescence imaging of Cy5.5-modified P@DW/BC NSs after intravenous injection. (B) *Ex vivo* fluorescence images of tumor and major organs at 24 h post injection. (C) Quantification of fluorescence intensity of tumor and major organs.

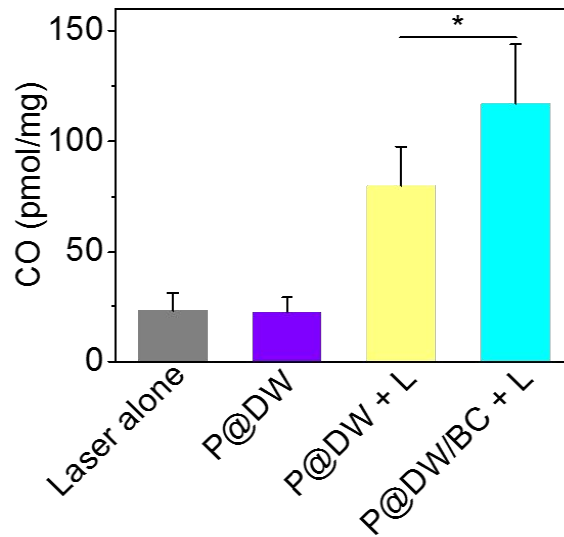

**Figure S12.** CO contents in tumor tissues of mice treated with laser alone, P@DW, P@DW + L, and P@DW/BC + L. 100  $\mu\text{L}$  of P@DW NSs (10 mg mL<sup>-1</sup>) were injected to each mouse.  $n = 3$ , \* $p < 0.05$ .

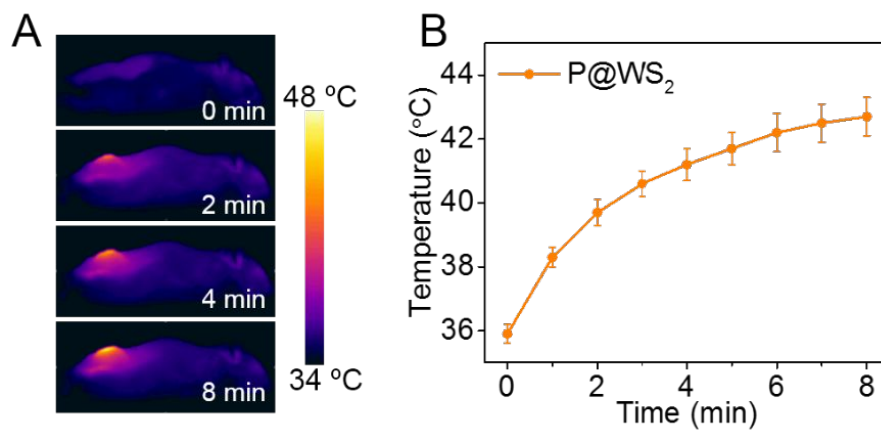

**Figure S13.** (A) *In vivo* IR thermal imaging of mice treated with P@WS<sub>2</sub> NSs (100  $\mu$ L per mouse, 9 mg mL<sup>-1</sup>) under 808 nm laser irradiation (1 W cm<sup>-2</sup>). (B) Temperature changes of tumor tissues during the irradiation. The dosage of P@WS<sub>2</sub> NSs for each mouse was controlled to result in nearly the same *in vivo* photothermal effect as P@DW/BC NSs (100  $\mu$ L per mouse, 10 mg mL<sup>-1</sup>).

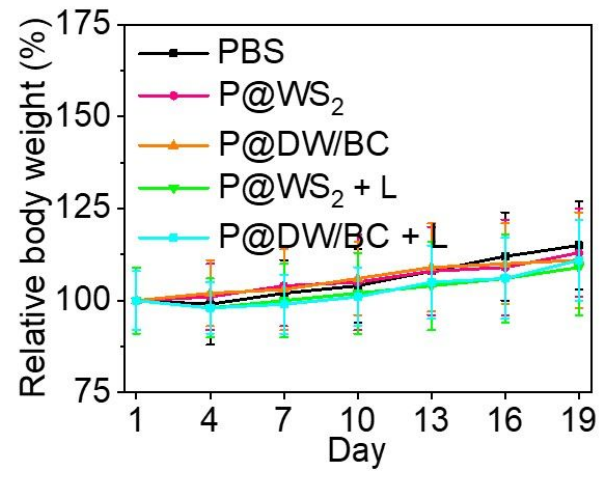

**Figure S14.** Relative body weight of mice from different groups during the treatments.

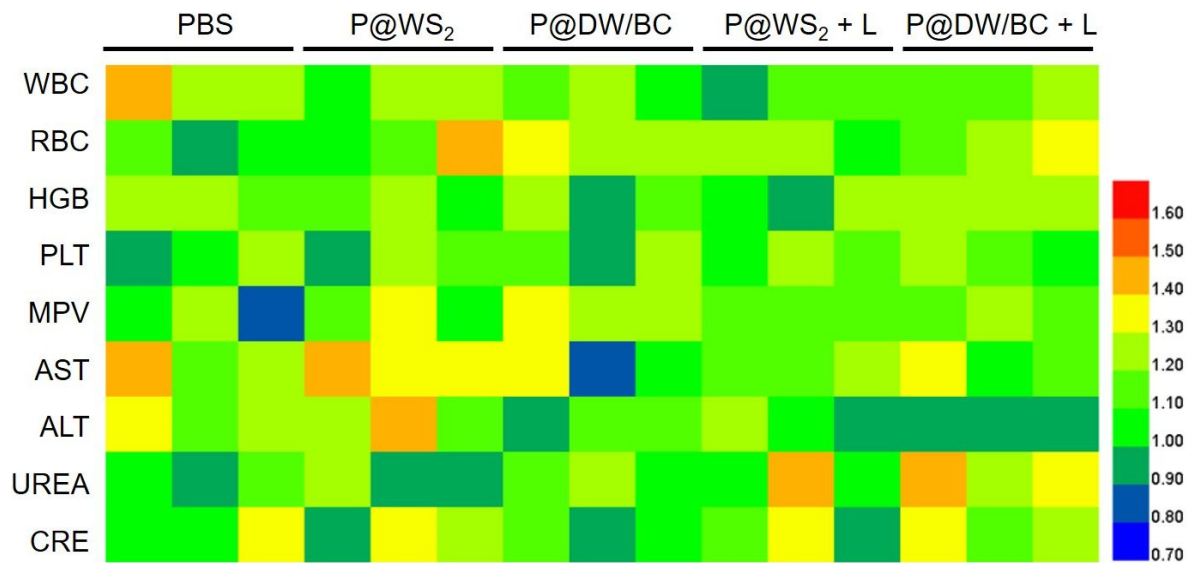

**Figure S15.** Blood biochemistry analyses of mice from different groups on the 19th day.

The results were shown as the relative intensity of the indexes.



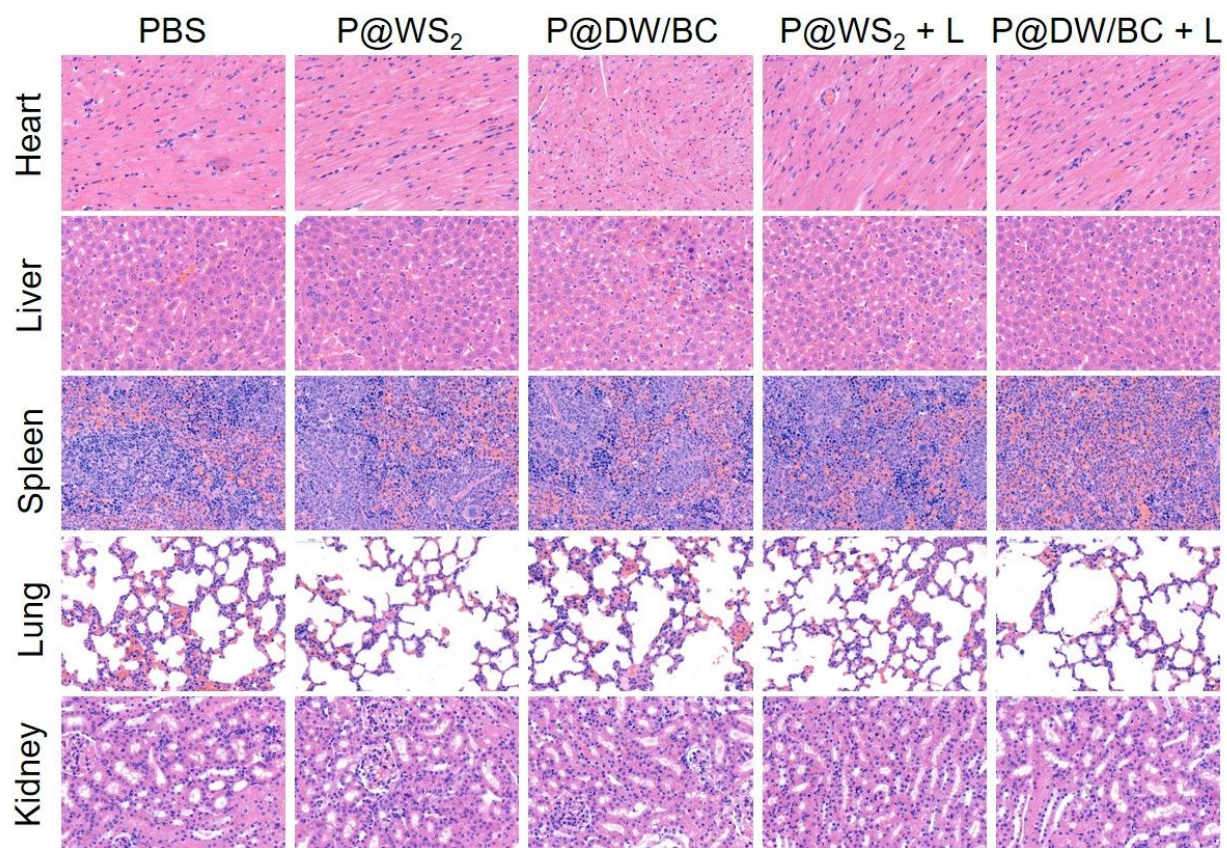

**Figure S16.** H&E staining pictures of major organs of mice from different groups on the 19th day ( $\times 40$ ).

**Table 1.** Photothermal conversion efficiency of some representative PTAs.

| PTAs                          | Photothermal conversion efficiency (%) | References                                                    |
|-------------------------------|----------------------------------------|---------------------------------------------------------------|
| Graphene oxide                | 25                                     | <i>Chem. Commun.</i> <b>2014</b> , <i>50</i> , 14345          |
| MoS <sub>2</sub> NSs          | 24                                     | <i>ACS Nano.</i> <b>2014</b> , <i>8</i> , 6922                |
| Black phosphorus quantum dots | 28.4                                   | <i>Angew. Chem. Int., Ed.</i> <b>2015</b> , <i>54</i> , 11526 |
| PEG-TaS <sub>2</sub> NSs      | 39                                     | <i>Adv. Funct. Mater.</i> <b>2017</b> , <i>27</i> , 1703261   |
| WS <sub>2</sub> quantum dots  | 44.3                                   | <i>ACS Nano.</i> <b>2015</b> , <i>9</i> , 12451               |
| Antimonene quantum dots       | 45.5                                   | <i>Angew. Chem. Int., Ed.</i> <b>2017</b> , <i>56</i> , 11896 |
